# Supplementary material for: One-drop chemosensing of dapoxetine hydrochloride using opto-analysis by multi-channel μPAD decorated silver nanoparticles: introducing a paper-based microfluidic portable device/sensor toward naked-eye pharmaceutical analysis by lab-on-paper technology
Source: Royal Society of Chemistry journal article supplement (doi:10.1039/d3ra06752a), 2024-01-01
Supplement: d3ra06752a5.pdf [file d3ra06752a5.pdf]

## Supplementary information

### One-drop chemosensing of Dapoxetine using opto-analysis by multi-channel $\mu$ PCD decorated silver nanoparticles: Introducing a portable device toward naked-eye biomedical analysis

Farnaz Bahavarnia <sup>a</sup>, Fereshteh Kohansal <sup>b</sup>, Mohammad Hasanzadeh <sup>c,\*</sup>

<sup>a</sup> Nutrition Research Center, Tabriz University of Medical Sciences, Tabriz, Iran.

<sup>b</sup> Drug Applied Research Center, Tabriz University of Medical Sciences, Tabriz, Iran.

<sup>c</sup> Pharmaceutical Analysis Research Center, Tabriz University of Medical Sciences, Tabriz, Iran.

#### Corresponding Author

\* (Mohammad Hasanzadeh) Pharmaceutical Analysis Research Center, Tabriz University of Medical Sciences, Tabriz, Iran. E-mail address: (\*) [hasanzadehm@tbzmed.ac.ir](mailto:hasanzadehm@tbzmed.ac.ir);

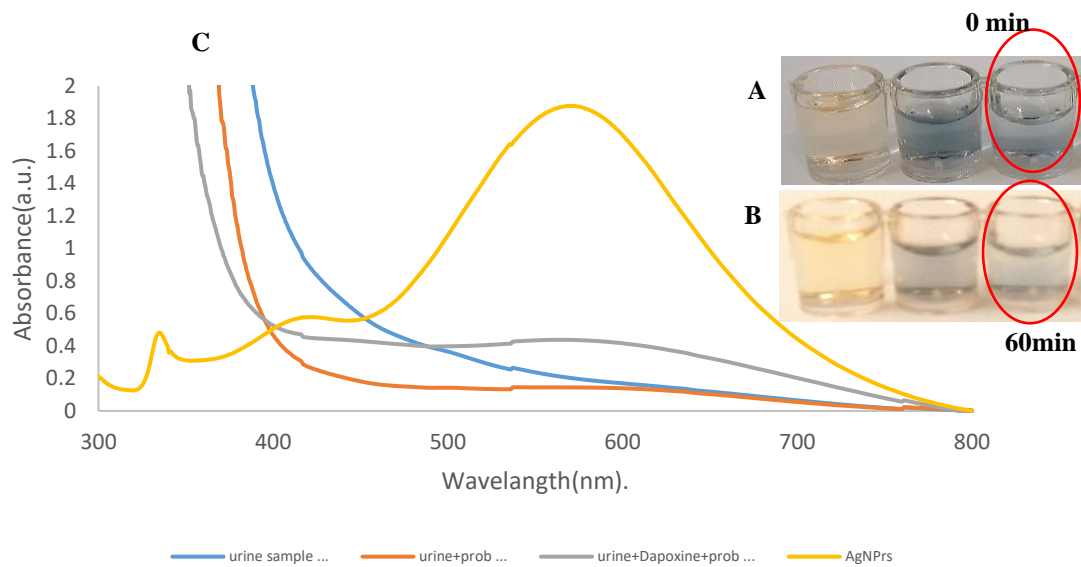

**Fig. S1.** (A) Colorimetric sensing of Urine, Urine + AgNPrs, DPX+Urine, AgNPrs, AgNPrs a 1 : 1 ratio and 1:0.5:0.5.at 0 min . (B) Colorimetric sensing of Urine, Urine + AgNPrs, DPX+Urine,AgNPrs, AgNPrs a 1 : 1 ratio and 1:0.5:0.5. a t6 0 min. (C) UV-Vis spectra, Urine, Urine + AgNPrs, DPX+Urine,AgNPrs, AgNPrs a 1 : 1 ratio and 1:0.5:0.5.

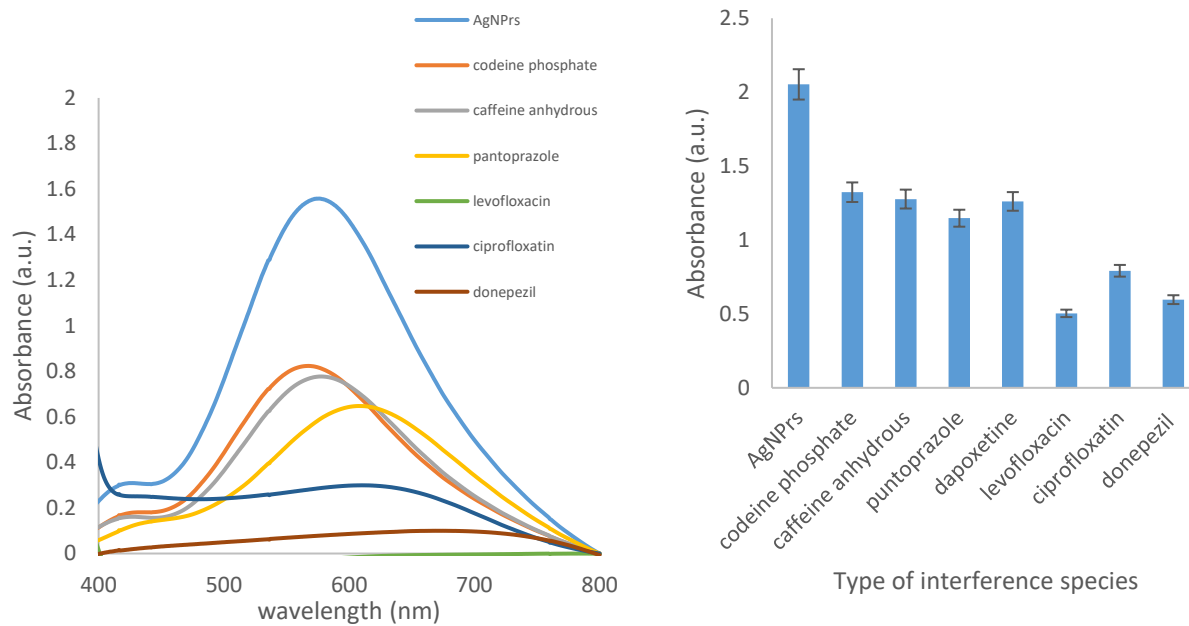

**Fig. S2:** (A) UV-Vis absorption spectra of AgNPrs, AgNPrs + Drugs (10mM) and (B) Histogram of peak intensity versus of AgNPrs, AgNPrs + Drugs (10mM) in 0 min

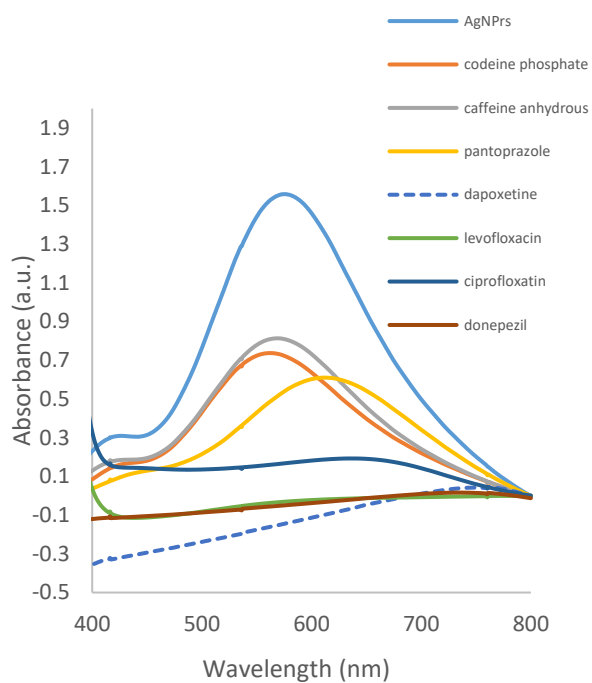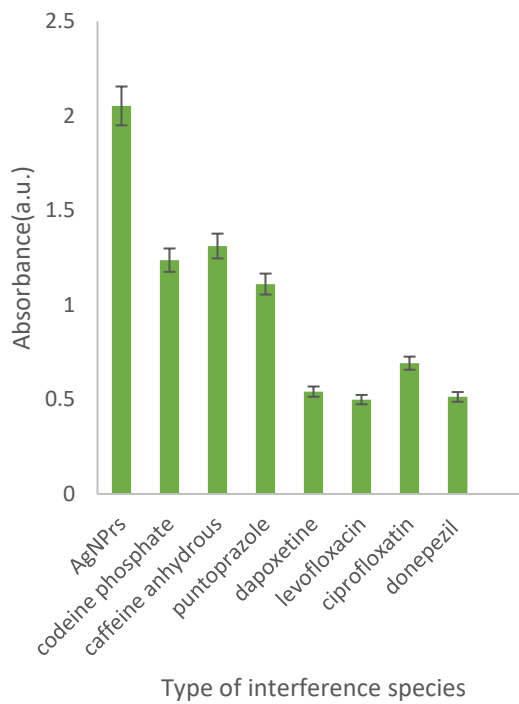

**Fig. S3:** **A)** UV-Vis absorption spectra of AgNPrs, AgNPrs + Drugs (10mM) and **B)** the histogram curve of peak intensity versus of AgNPrs, AgNPrs + Drugs (10mM) in 60 min

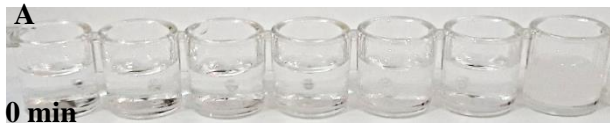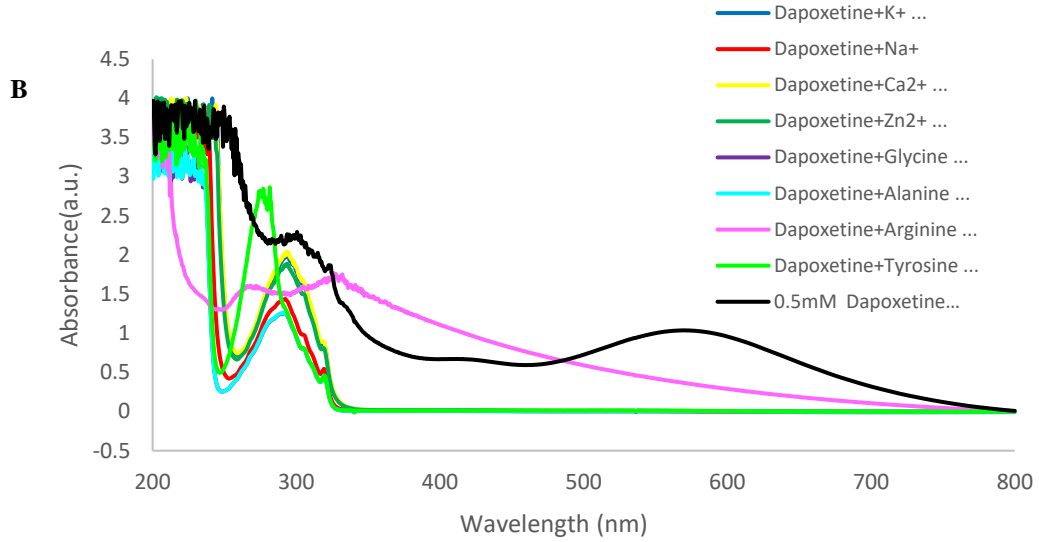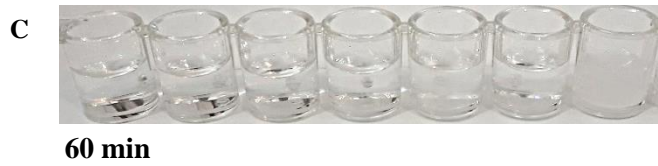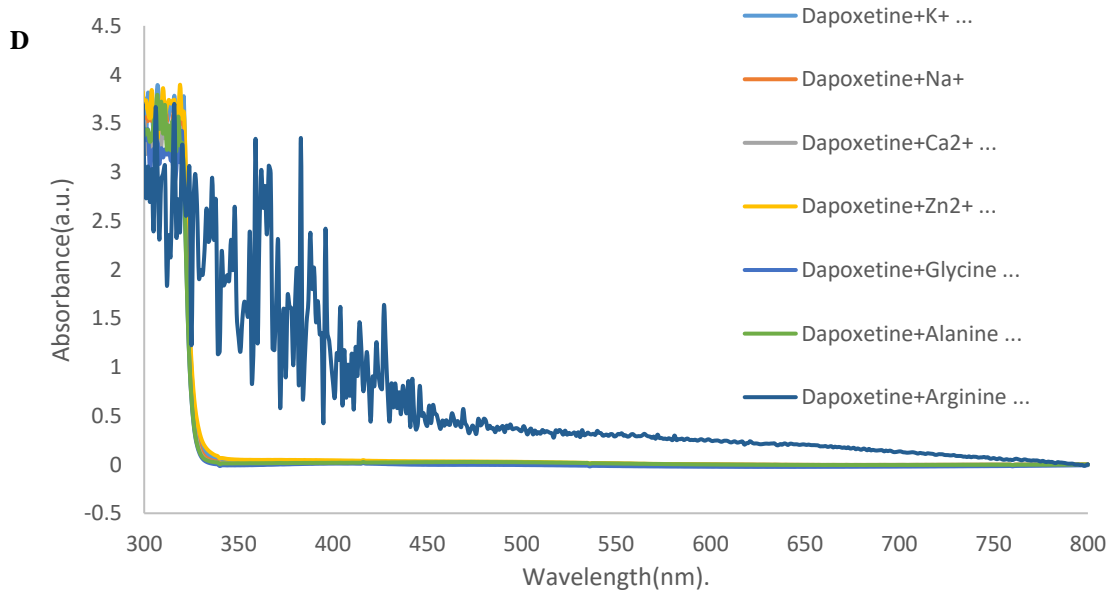

**E**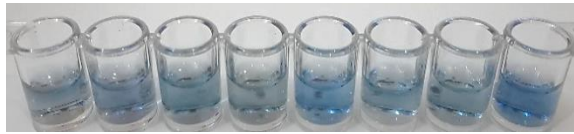**0 min**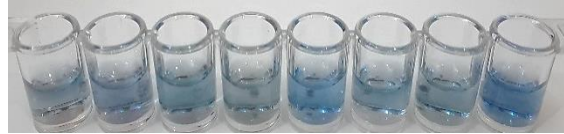**60 min****F**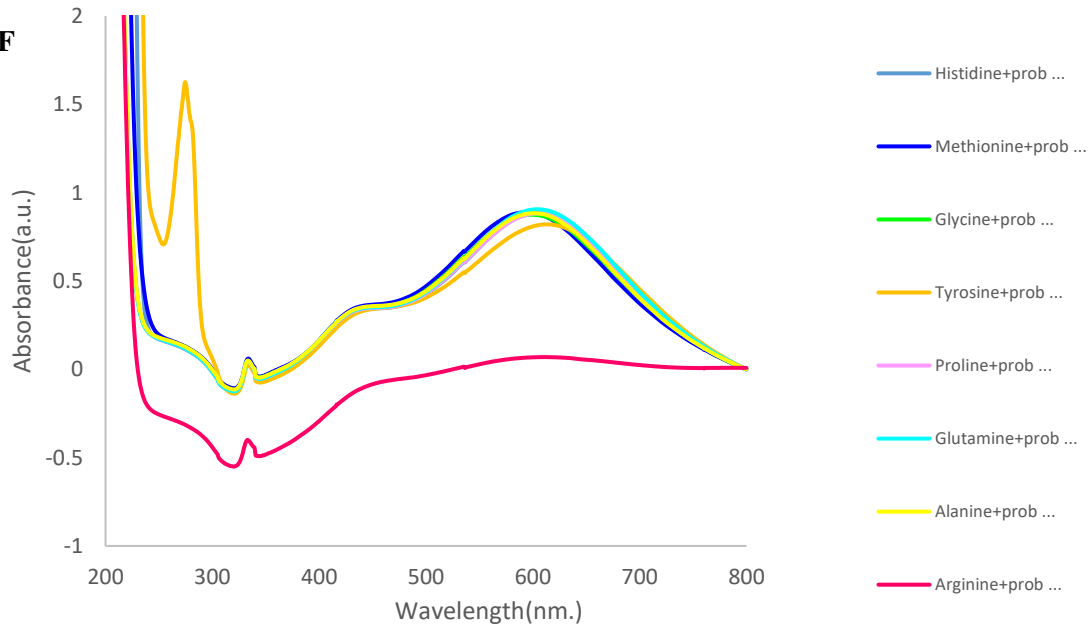**G**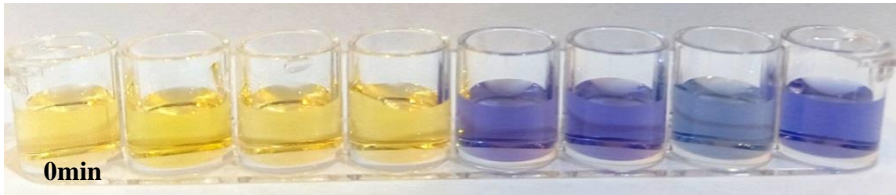**0min****H**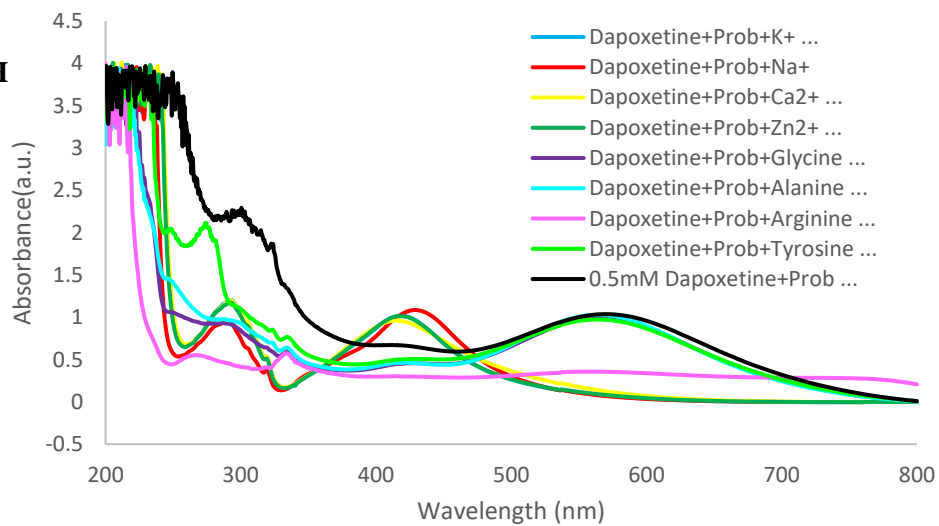

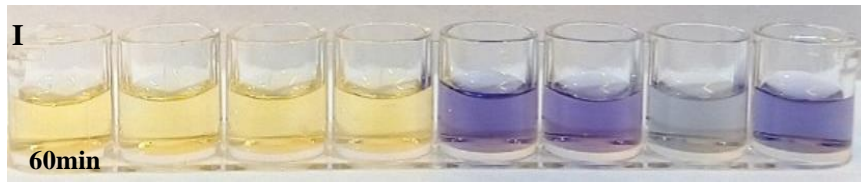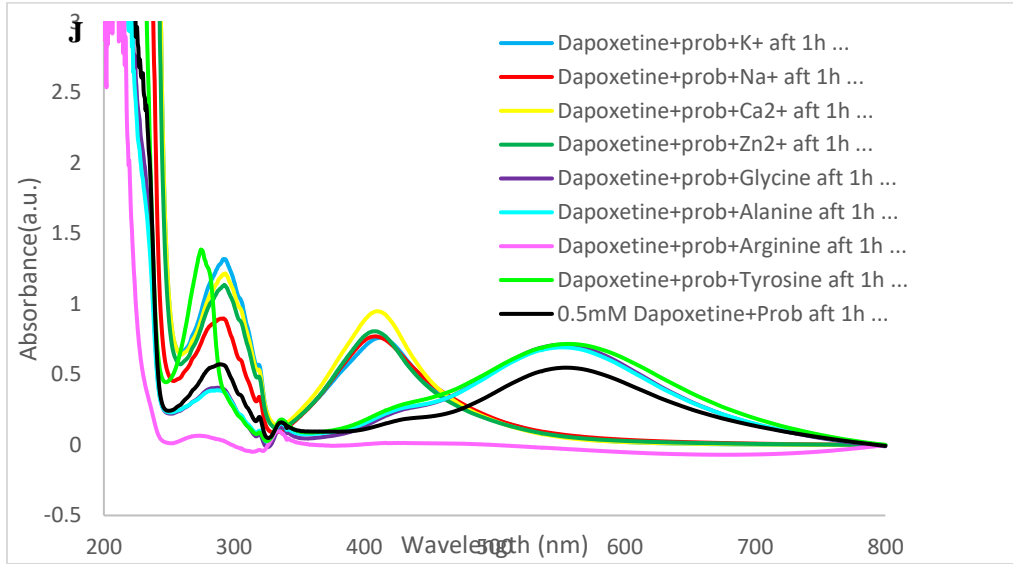

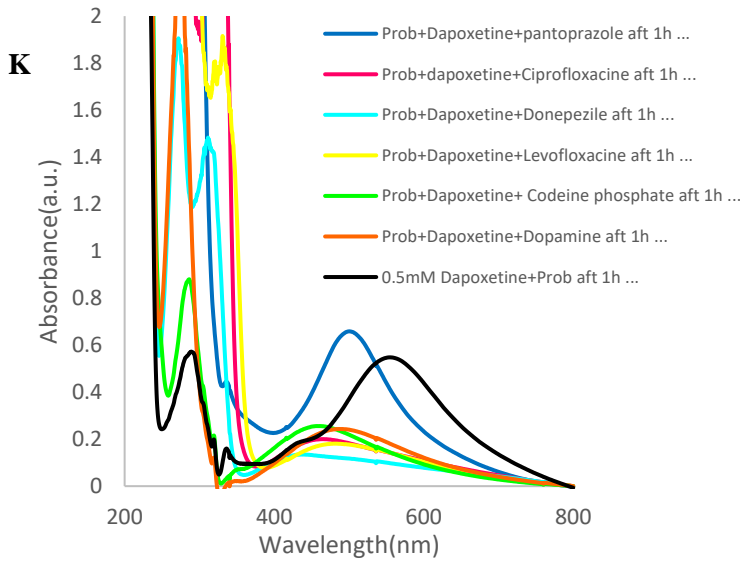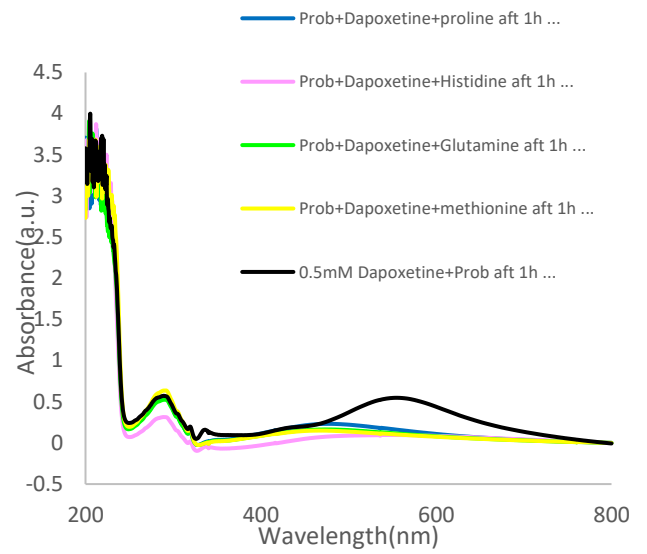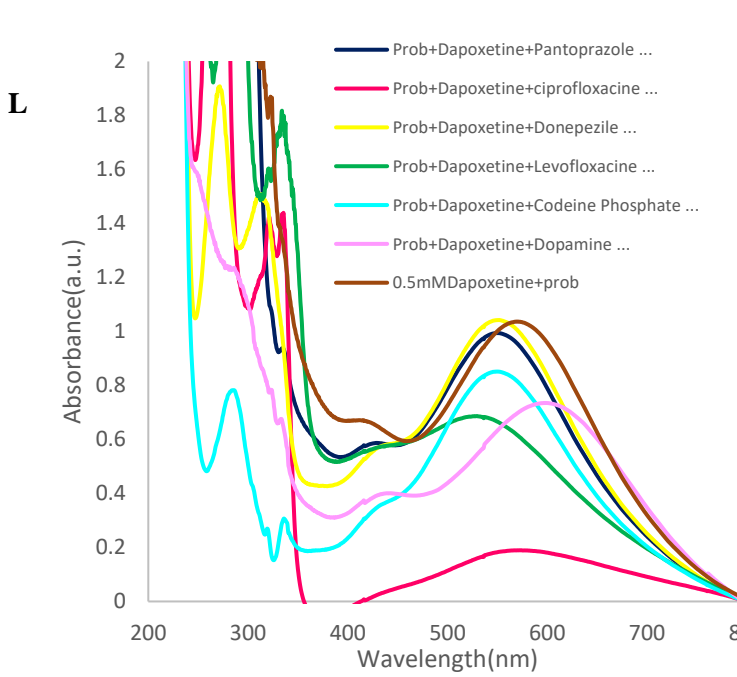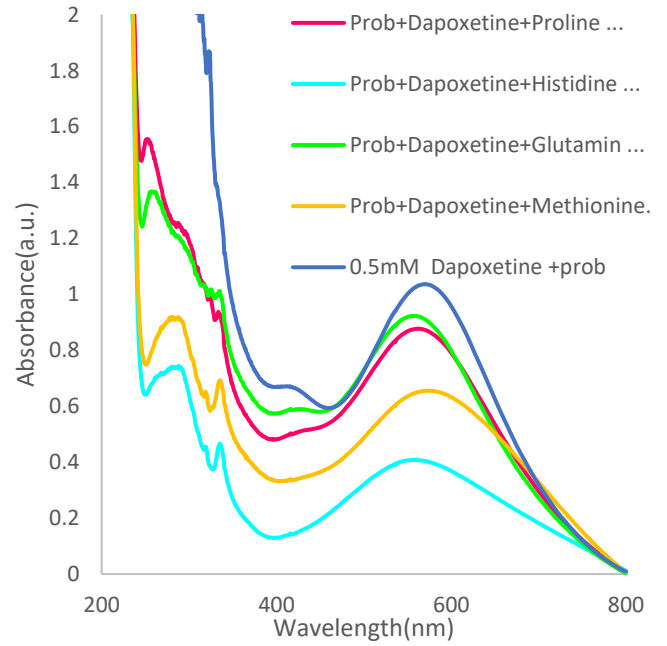



M

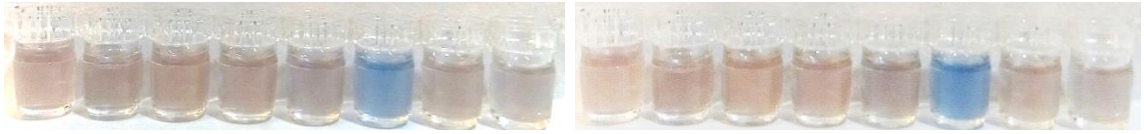

0min

60min

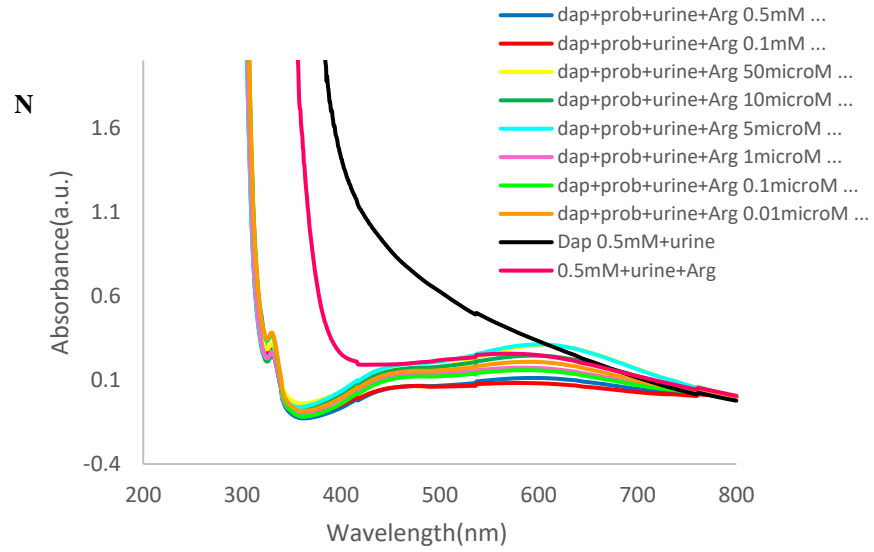

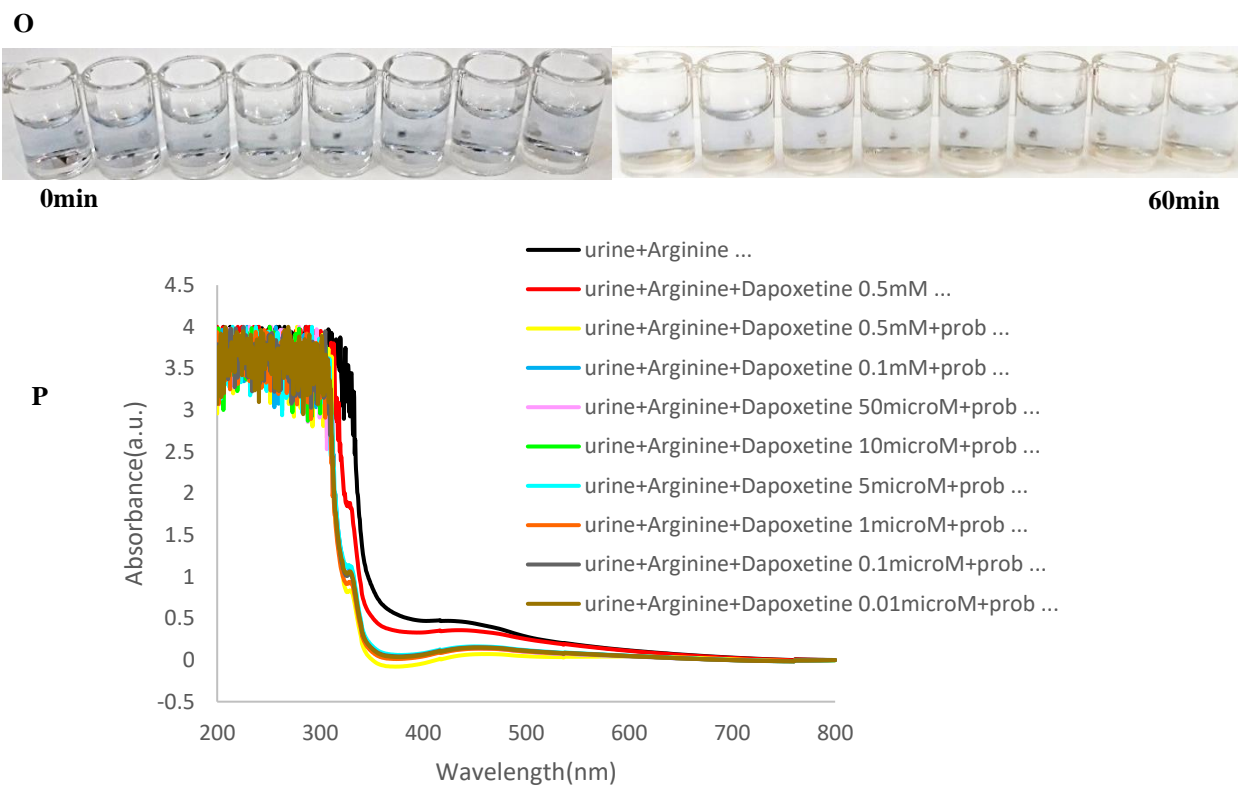

**Fig. S4.** (A), Photographic images (DPX +ions,AA) in 0min (1 : 1 v/v ratio),(B), UV-Vis spectra, DPX+ ions,AA, in 0min (1 : 1 v/v ratio) , (C), Photographic images (DPX +prob+ions,AA) in 0min (1:0.5:0.5 v/v ratio),(D), UV-Vis spectra, DPX+ ions,AA, in 0min (1:0.5:0.5 v/v ratio) (E), Photographic images (DPX +prob+AA) in 0,60min(1:0.5:0.5 v/v ratio),(F), UV-Vis spectra, DPX+ ions,AA, in 0,60min (1:0.5:0.5 v/v ratio) (G), Photographic images (DPX +prob+ions,AA) in 0min(1:0.5:0.5 v/v ratio) (H), UV-Vis spectra, DPX+ ions,AA, in 0min (1:0.5:0.5 v/v ratio), (I), Photographic images (DPX +prob+ions,AA) in 60min(1:0.5:0.5 v/v ratio), (J), UV-Vis spectra, DPX+ ions,AA, in 60min (1:0.5:0.5 v/v ratio), (K), UV-Vis spectra, DPX+ drugs,AA, in 0 min (1:0.5:0.5 v/v ratio), (L) UV-Vis spectra, DPX+ drugs,AA, in 60min (1:0.5:0.5 v/v ratio), (M) Photographic images (DPX +probe+urine+ different concentration of AA Arginine) in 0,60min(1:0.5:0.5 v/v ratio) (N), UV-Vis spectra, (DPX +probe+urine+ different concentration of AA Arginine), (1:0.5:0.5 v/v ratio),(O) Photographic images ( different concentration of DPX +urine+AA Arginine, (1:0.5:0.5 v/v ratio) in 0,60min(1:0.5:0.5 v/v ratio), (P), UV-Vis spectra, ( different concentration of DPX +urine+AA Arginine, (1:0.5:0.5 v/v ratio).

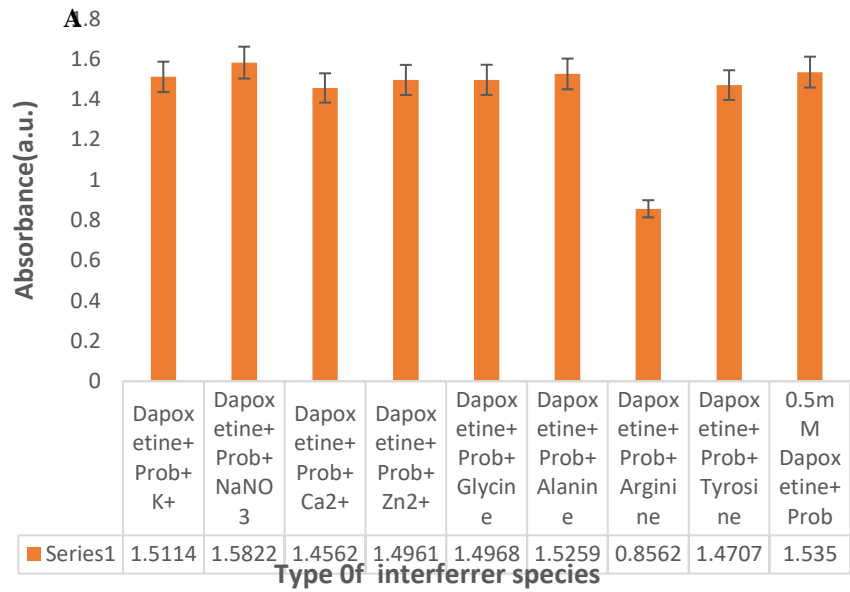

**B**

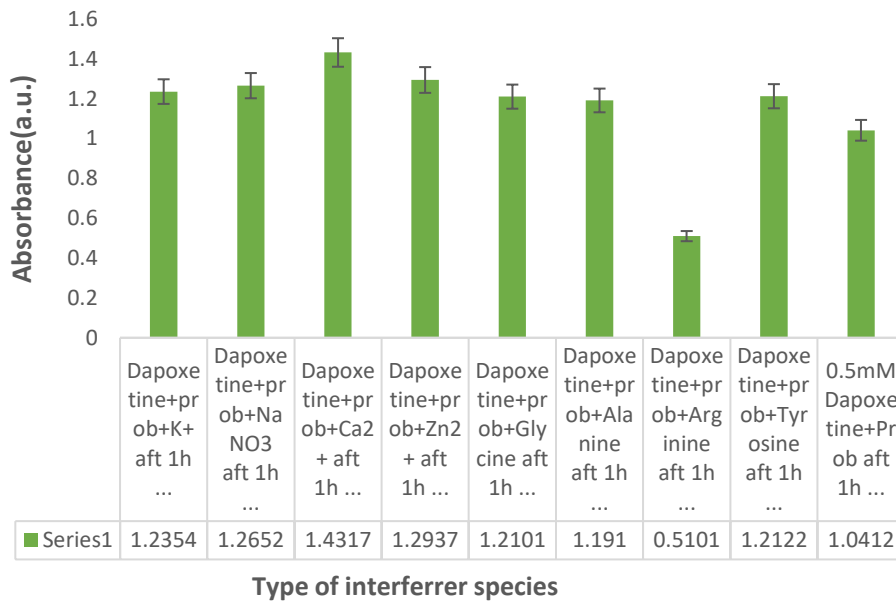

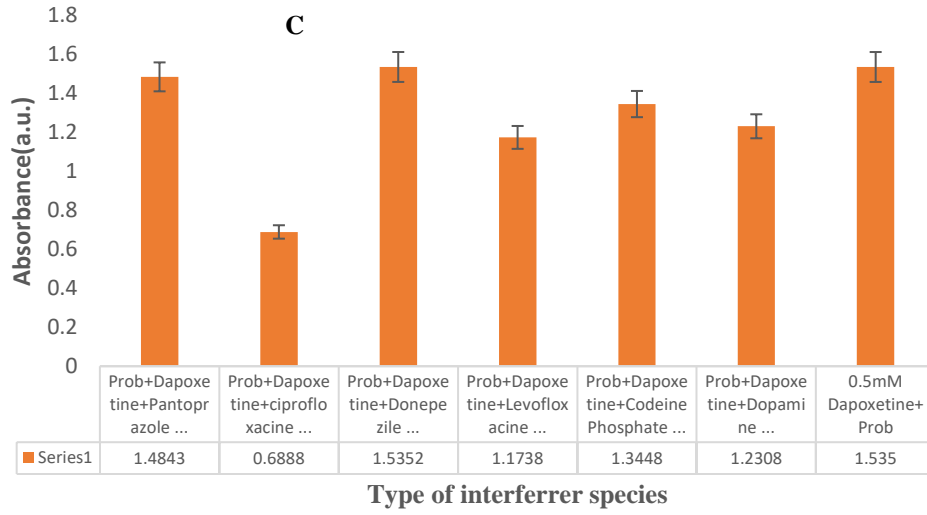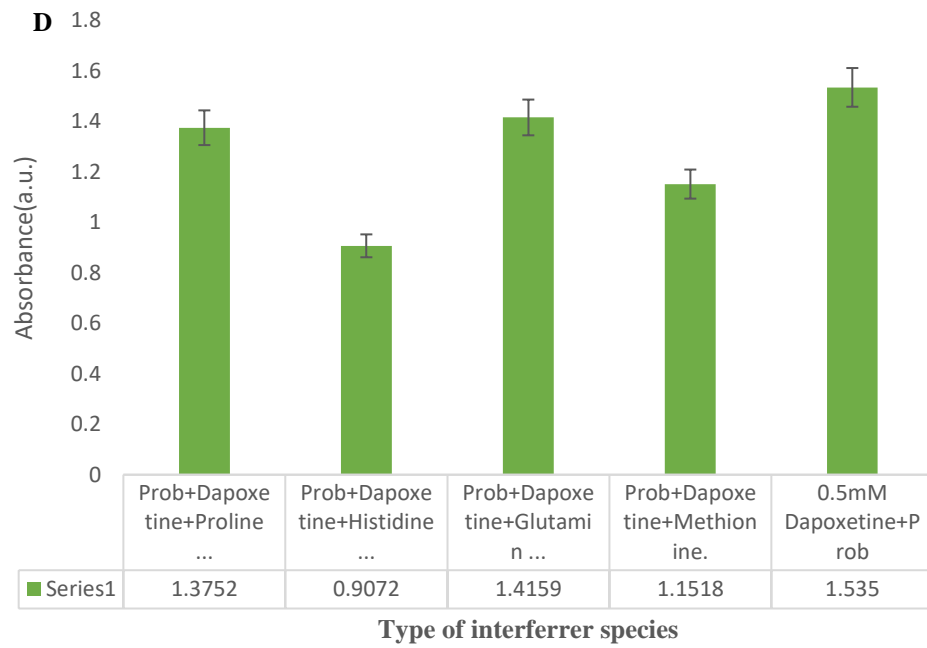

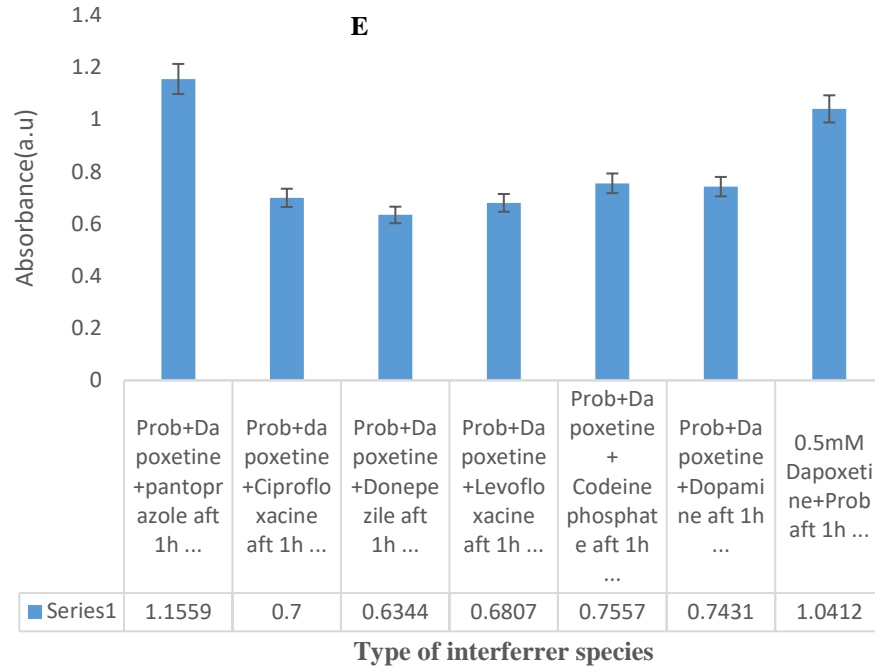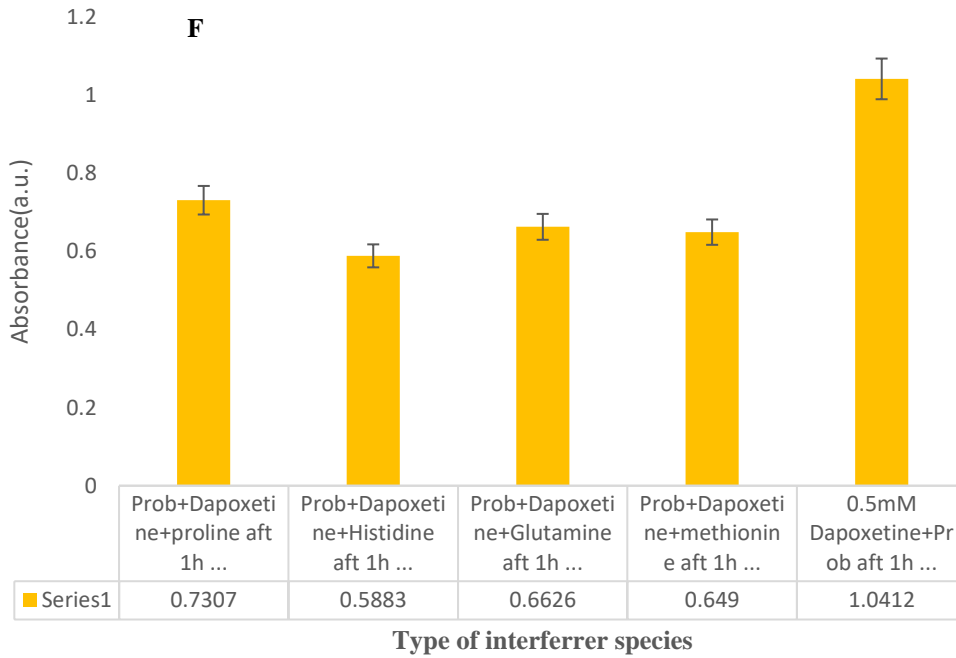

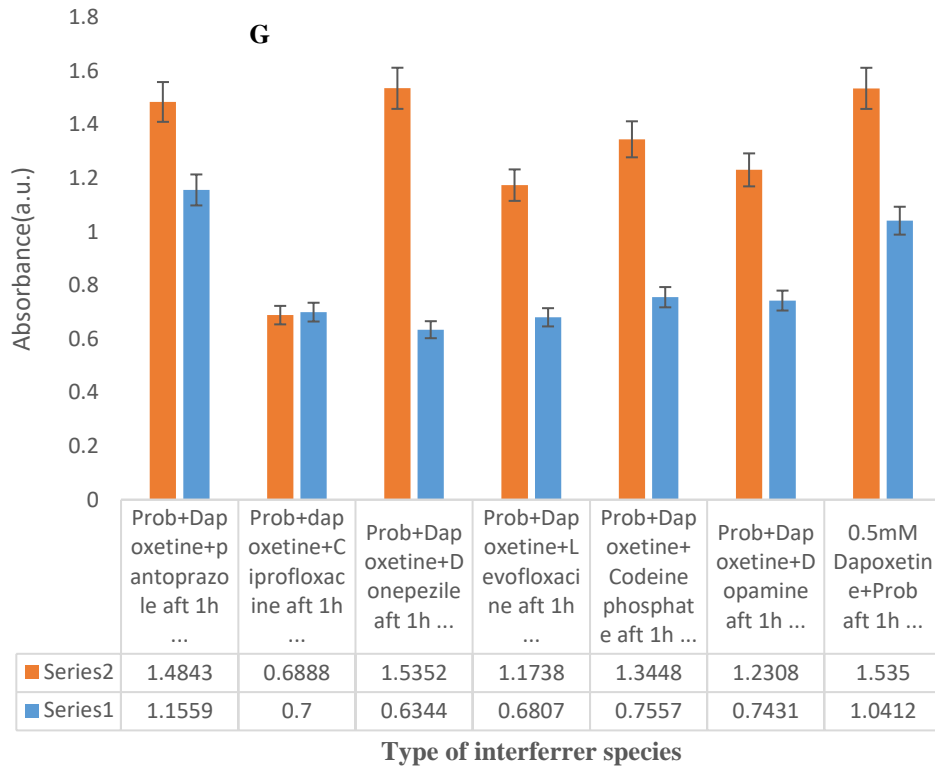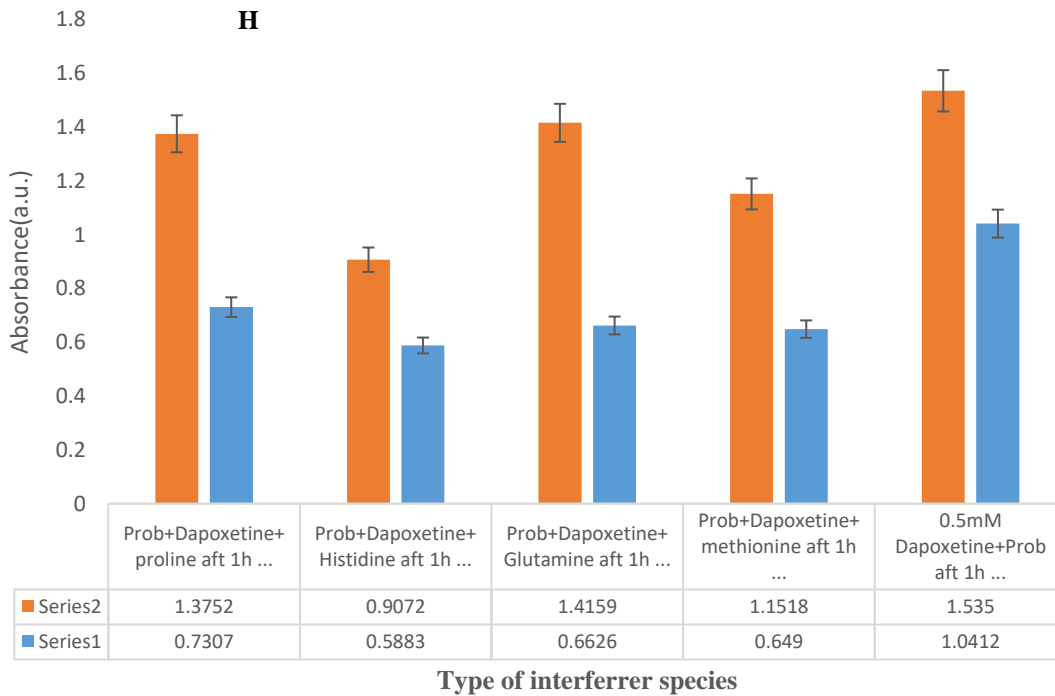

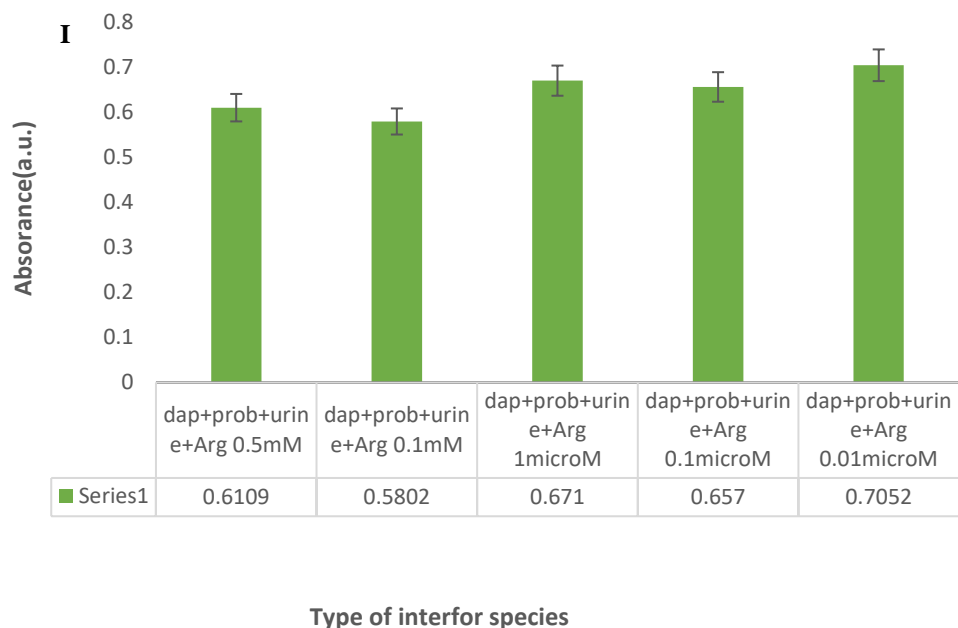

**Fig. S5. A.** The histogram curve of peak intensity versus prob +drug vs interference in 0 min (1:0.5:0.5 v/v ratio), **B.** the histogram curve of peak intensity versus prob+drug vs interference in 60 min (1:0.5:0.5 v/v ratio), **C.** The histogram curve of peak intensity versus prob+DPX+drug in 0min (1:0.5:0.5 v/v ratio), **D.** The histogram curve of peak intensity versus prob+DPX +Amino acids in 0min (1:0.5:0.5 v/v ratio), **E.** The histogram curve of peak intensity versus prob+DPX+drug in 60min (1:0.5:0.5 v/v ratio), **F.** The histogram curve of peak intensity versus prob+DPX+drug in 60min (1:0.5:0.5 v/v ratio), **G.**Total calibration prob+DPX+drug in (0,60min) (1:0.5:0.5 v/v ratio), **H.** Total calibration prob+DPX+Amino acids (1:0.5:0.5 v/v ratio) in (0,60min), **I.** The histogram curve of peak intensity versus prob+DPX+different concentration of Arginine interference (1:0.5:0.5 v/v ratio)

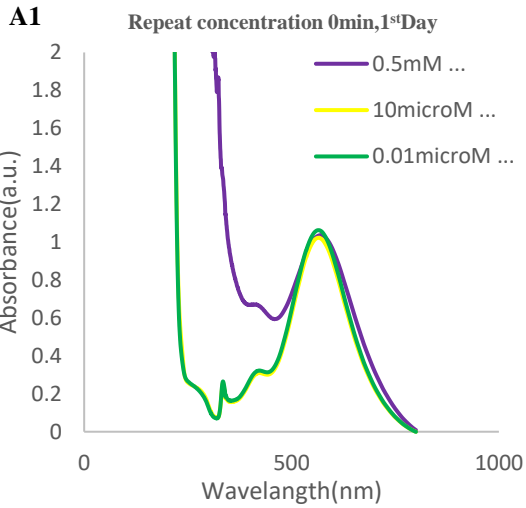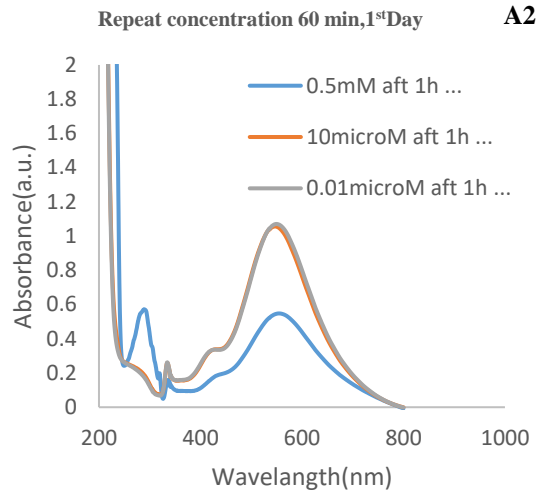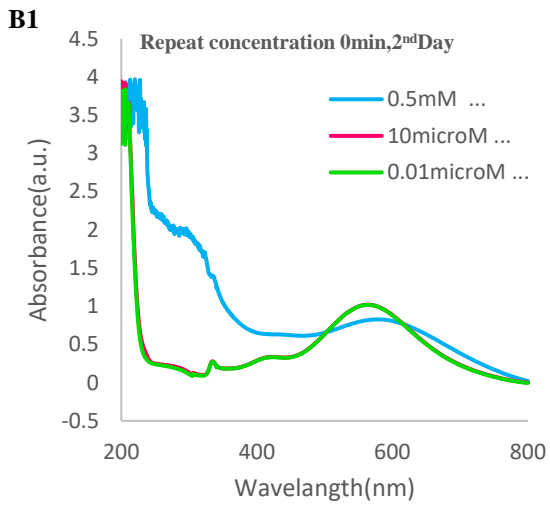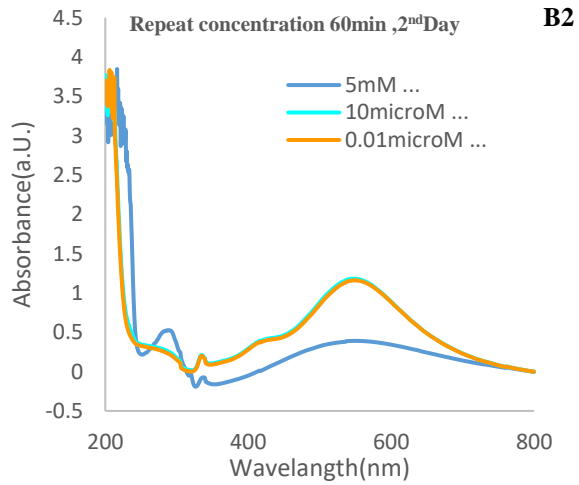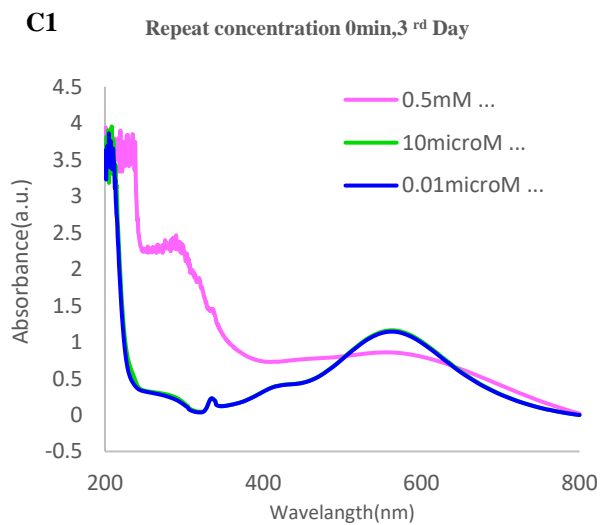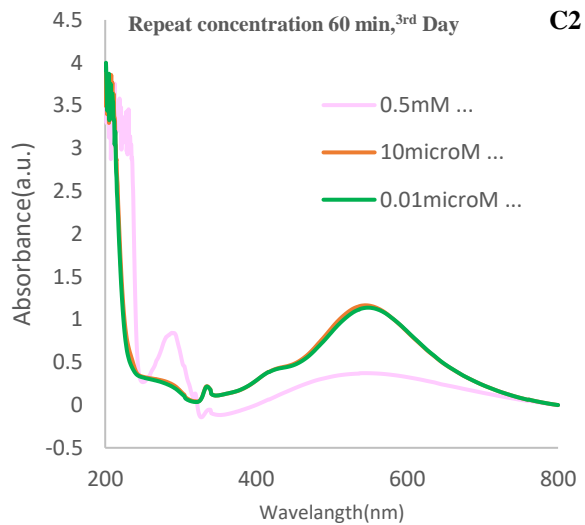



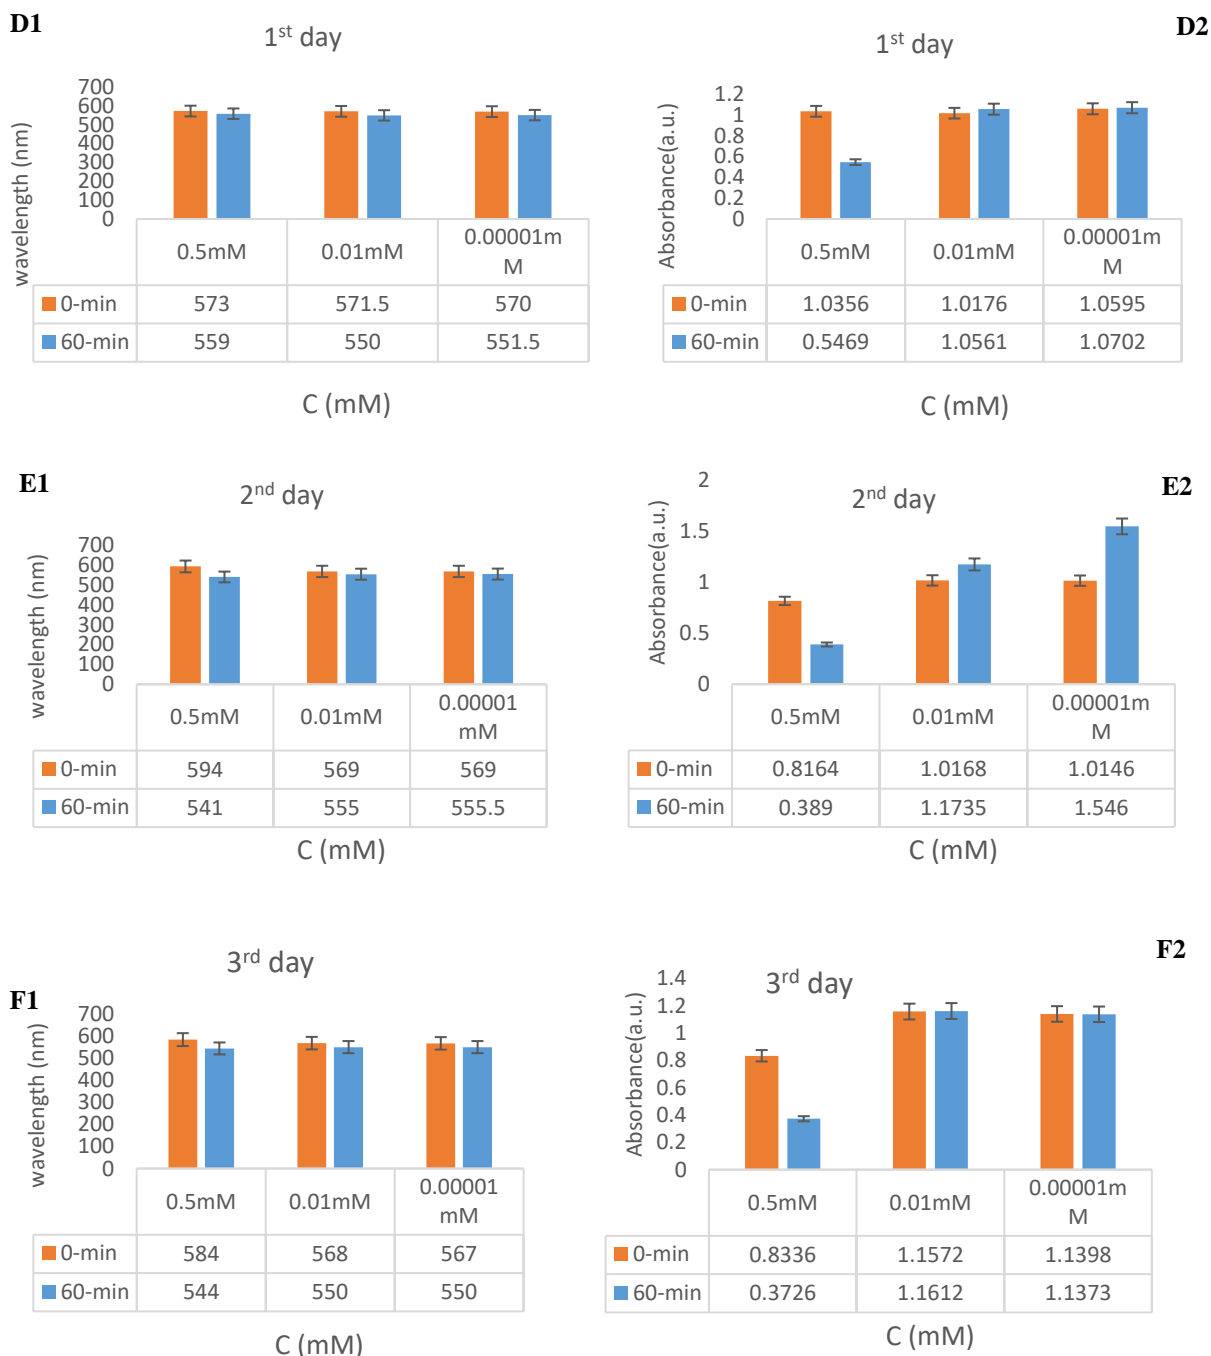

**Fig. S6.** UV-Vis spectral stability of DPX solution over a span of 3 days with different concentrations and at both the 0-minute and 60-minute marks, and the results of the histogram of DPX solution for 3 days with 3 different concentrations and at both the 0-minute and 60-minute marks. **A1.** UV-Vis spectra of DPX solution in 1 day at 0-min, **A2.** UV-Vis spectra of DPX solution in 1 day in 60-min, **B1.** UV-Vis spectra of DPX solution in 2 day with no initial incubation time, **B2.** UV-Vis spectra of DPX solution in 2 day with incubation time of 60 min, **C1.** UV-Vis spectra of DPX solution in 3 days with no initial incubation time, **C2.** UV-Vis spectra of DPX solution in 3 days with incubation time of 60-min, **D1.** The histogram curve of wavelength intensity versus of DPX solution in 1 day in incubation time of 0-min and 60-min (1:0.5:0.5 v/v ratio), **D2.** The histogram curve of peak intensity versus of DPX solution in incubation time of 1 day in

0, 60min (1:0.5:0.5 v/v ratio), **E1**. The histogram curve of wavelength intensity *versus* of DPX solution in 2 days in incubation time of 0-min and 60-min (1:0.5:0.5 v/v ratio), **E2**. The histogram curve of peak intensity versus of DPX solution in 2 days in incubation time of 0-min and 60-min (1:0.5:0.5 v/v ratio), **F1**. The histogram curve of wavelength intensity versus of DPX solution in 2 days in incubation time of 0-min and 60-min (1:0.5:0.5 v/v ratio), **F2**. The histogram curve of peak intensity versus of DPX solution in 2 days in incubation time of 0-min and 60-min (1:0.5:0.5 v/v ratio).

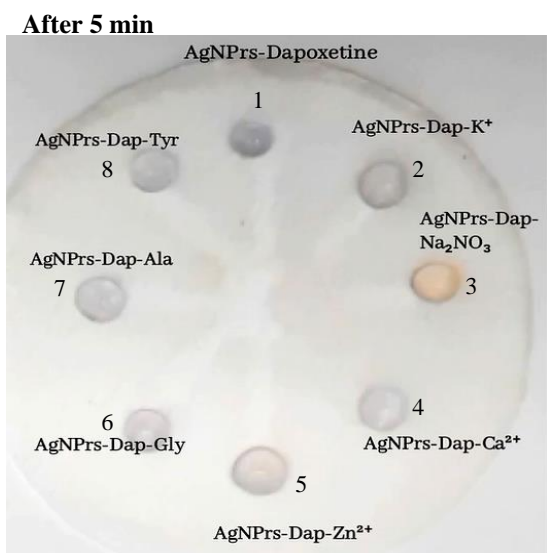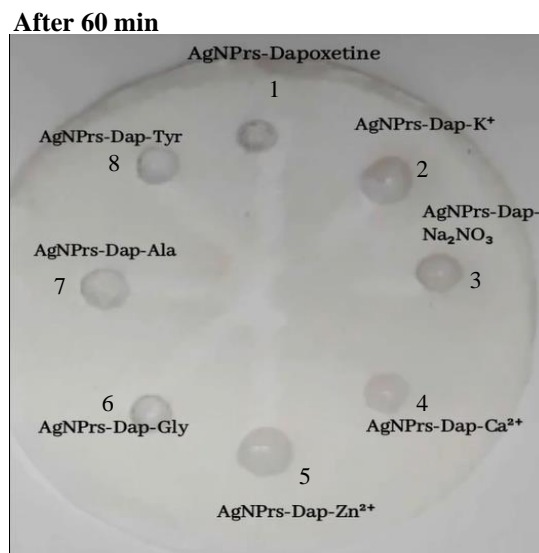

**Fig.S7.** Photographic images of the fiberglass microfluidic paper-based colorimetric chemosensor after 5 and 60 minutes.(1) DPX +AgNPrs, (2).DPX +AgNPrs+K<sup>+</sup> (3). DPX +AgNPrs+Na<sup>+</sup>, (4). DPX +AgNPrs+Ca<sup>2+</sup>, (5). DPX+AgNPrs+Zn<sup>2+</sup>, (6).DPX+AgNPrs+Glycine, (7).DPX+AgNPrs+Alanine, 8.DPX+AgNPrs+Tyrosine.

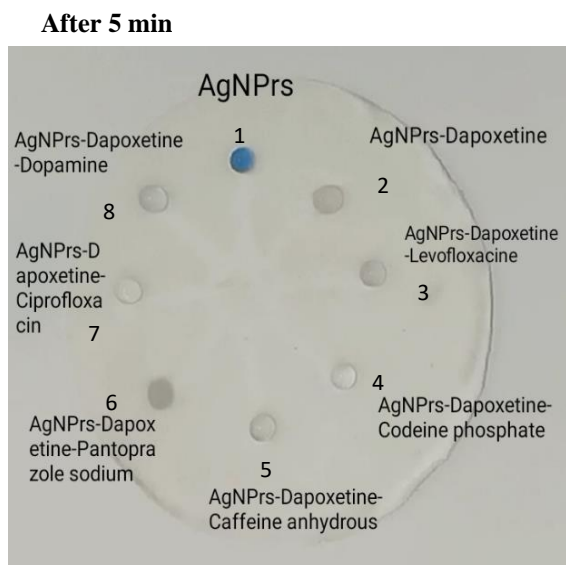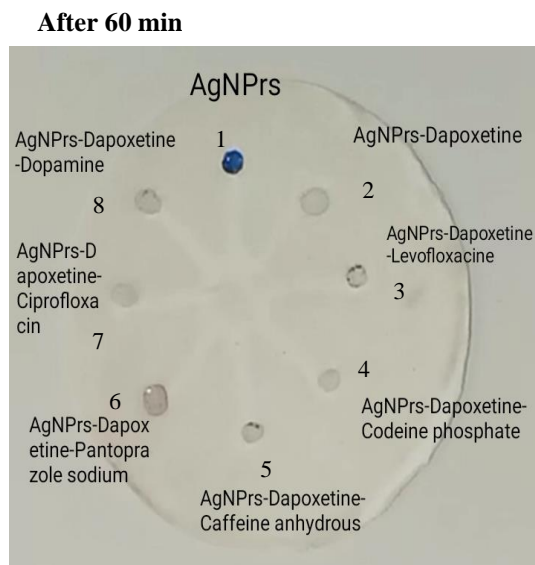

**Fig. S8.** Photographic images of the fiberglass microfluidic paper-based colorimetric chemosensor after 5 and 60 minutes. (1).AgNPrs, (2). DPX+AgNPrs, (3). DPX+AgNPrs+Levofloxacin, (4). DPX+AgNPrs+Codeine phosphate, (5). DPX+AgNPrs+Caffeine anhydrous, (6). DPX+AgNPrs+Pantoprazole sodium, (7). DPX+AgNPrs+Ciprofloxacin, (8). DPX+AgNPrs+Dopamine.

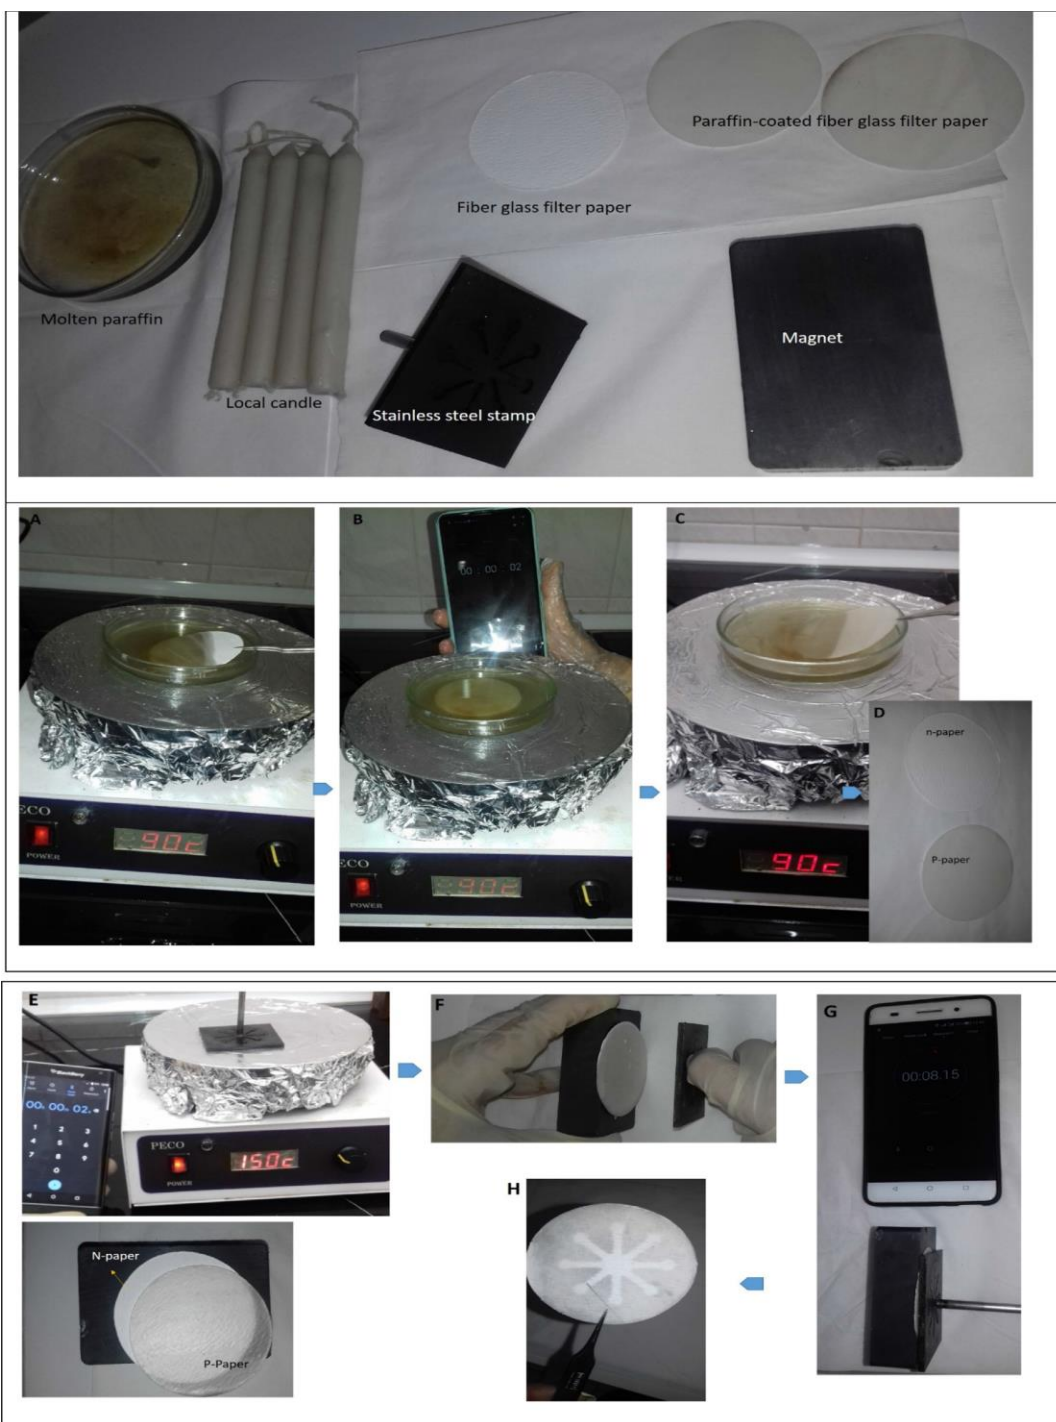

**Scheme S1.** Materials and equipment (I), and the process (II) of  $\mu$ PAD fabrication. Wax melting at 90 degrees Celsius, followed by filter paper, put it flat. (A), and left it for 2 s (B), afterwards, the filter paper was taken out (C) to prepare a paraffinic paper (D). The locally machined steel stamp was heated at 150 °C for 25° and the p-paper was put on the n-paper (E), before stamping (F). The stamping step was performed during 8 s (G) to prepare the proposed  $\mu$ PAD.

**Table S1.** UV-Vis Spectra Data for Different Concentrations and Time Intervals

| <b>Concentration (mM)</b>        | <b>0.5 mM</b> | <b>0.01 mM</b> | <b>0.00001 mM</b> |
|----------------------------------|---------------|----------------|-------------------|
| <b>Wavelength (nm)</b>           |               |                |                   |
| <b>1<sup>st</sup> day 0-min</b>  | 573           | 571.5          | 570               |
| <b>2<sup>nd</sup> day 0-min</b>  | 594           | 569            | 569               |
| <b>3<sup>rd</sup> day 0-min</b>  | 584           | 568            | 567               |
| <b>SD</b>                        | 10.50         | 1.80           | 1.52              |
| <b>1<sup>st</sup> day 60-min</b> | 559           | 550            | 551.5             |
| <b>2<sup>nd</sup> day 60-min</b> | 541           | 555            | 555.5             |
| <b>3<sup>rd</sup> day 60-min</b> | 544           | 550            | 550               |
| <b>SD</b>                        | 9.64          | 2.88           | 2.84              |
